# Supplementary material for: Synthesis and Characterization of Biocompatible Cryogels Based on Chitosan, Poly(ethylene glycol) Diacrylate, and Graphene with a Controlled Porous Structure
Source: Research Square preprint supplement (doi:10.21203/rs.3.rs-7921361/v1), 2026-02-19
Supplement: Supplementary file 1 [file 5849a1bc16afcefaa6858440.docx]

**Synthesis and Characterization of Biocompatible Cryogels Based on Chitosan, Poly(ethylene glycol) Diacrylate, and Graphene with a Controlled Porous Structure**

A.S. Buinov1*, E.R. Gafarova2, K.N. Bardakova2,3, B.Ch. Kholkhoev1, V.M. Poglazova2, N.B. Serezhnikova2, Y.M. Efremov2, I.A. Farion1, D.I. Gapich4,5, V.A. Kuznetsov4,5, P.S. Timashev2,6,7, V.F. Burdukovskii1

1 *Baikal Institute of Nature Management
Siberian branch of the Russian Academy of Sciences,*

*Russian Federation, 670047 Ulan-Ude, 6 Sakhyanovoy str.*

2 *Institute for Regenerative Medicine, Sechenov First Moscow State Medical University (Sechenov University), Russian Federation, 119991 Moscow, 8-2 Trubetskaya str.*

3 *National Research Centre “Kurchatov Institute”, Russian Federation, 123182 Moscow, 1 Akademika Kurchatova Square*

4 *Nikolaev Institute of Inorganic Chemistry
Siberian Branch of Russian Academy of Sciences, Russian Federation, 630090 Novosibirsk, 3 Acad. Lavrentiev Ave.*

5 *Novosibirsk State Technical University, Russian Federation, 630073 Novosibirsk, 20 K. Marx ave.*

6 *Semenov Institute of Chemical Physics, Russian Academy of Sciences, Russian Federation, 119991 Moscow, 4 Kosygina str.*

7 *Chemistry Department, Lomonosov Moscow State University, Russian Federation, 119991 Moscow, 1-3 Leninskiye Gory*

*Corresponding author

E-mail: [buinov.aleksandr.96@mail.ru](mailto:buinov.aleksandr.96@mail.ru)


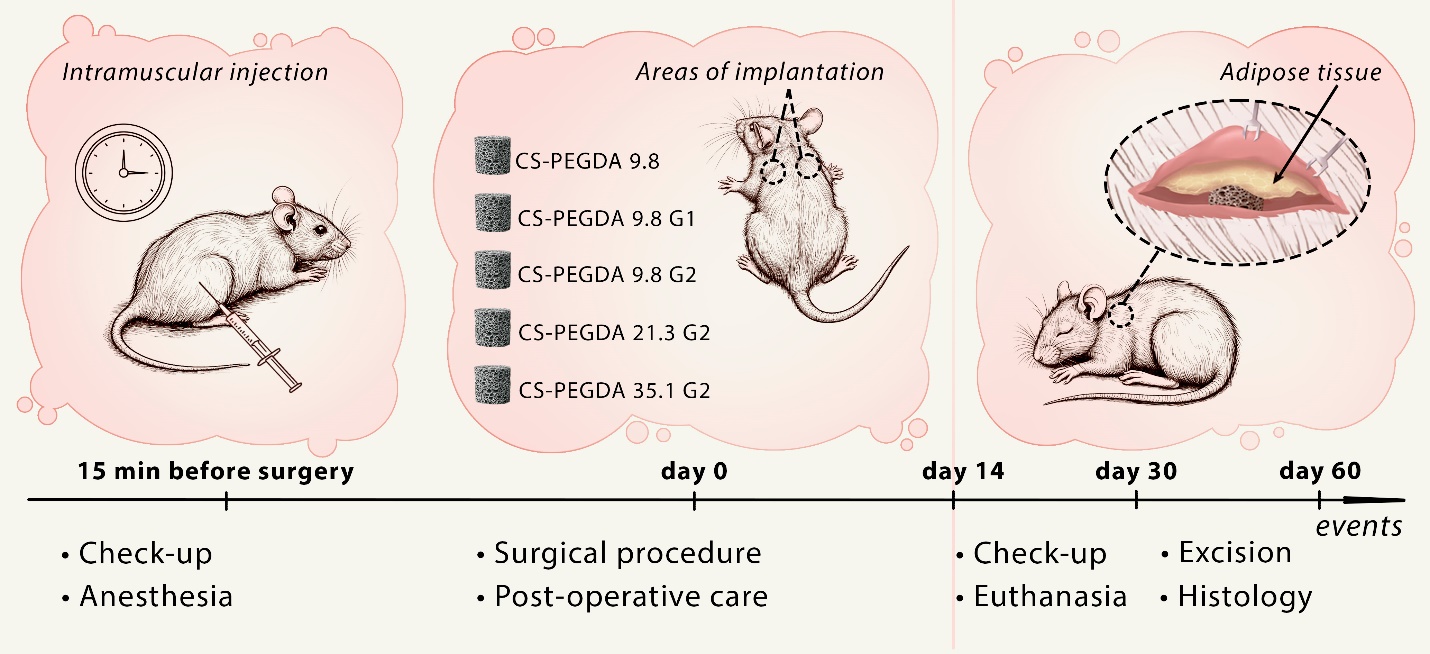


**Figure S1.** Experimental design of subcutaneous implantation in rats.


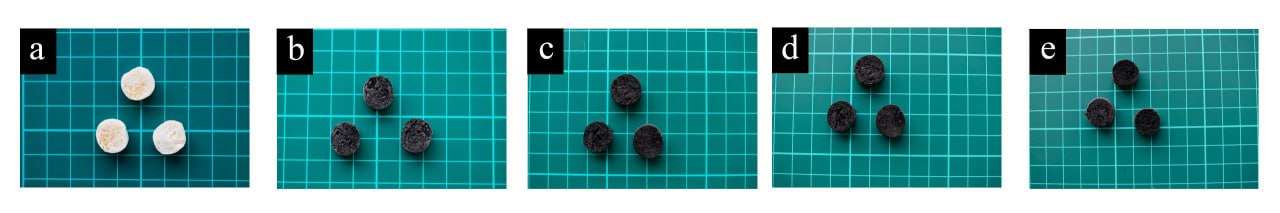


**Figure S2.** Macrophotographs of porous chitosan-based scaffolds crosslinked with PEGDA: **(a)** CS-PEGDA 9.8, **(b)** CS-PEGDA 9.8 G1, **(c)** CS-PEGDA 9.8 G2, **(d)** CS-PEGDA 21.3 G2, **(e)** CS-PEGDA 35.1 G2.

**Table S1.** Criteria for semi-quantitative evaluations of morphological parameters of skin samples with implanted material according to a five-point scale

| Parameter | Evaluation criteria | Grade |
| --- | --- | --- |
| Inflammatory reaction in the dermis (infiltration of lymphocytes, macrophages, neutrophils) | Absent | 0 |
| Single immune cells | 1 |
| Several clusters of immune cells | 2 |
| Multiple clusters of immune cells | 3 |
| Significant diffuse infiltration of immune cells | 4 |
| Exudative inflammation in the implant (neutrophil infiltration) | Absent | 0 |
| Single neutrophils on the implant surface | 1 |
| Individual small clusters of neutrophils in the pores of the implant, occupying ~ 1/3 of the implant area | 2 |
| Numerous clusters of neutrophils in the pores of the implant, occupying ~ 1/2 of the implant area | 3 |
| All pores of the implant are filled with neutrophilic detritus and fibrin | 4 |
| Infiltration of the implant by macrophages and giant multinucleated cells | Absent | 0 |
| Single immune cells | 1 |
| Several clusters of immune cells | 2 |
| Multiple clusters of immune cells | 3 |
| Significant diffuse infiltration by immune cells | 4 |
| Implant resorption | Absent | 0 |
| Single fibers of the implant material are loosened and undergo cellular resorption | 1 |
| Several clusters of resorptions of the implant material along the periphery | 2 |
| Multiple clusters of resorptions of the material over the entire area of ​​the implant | 3 |
| Significant resorptions of the entire implant material | 4 |
| Implant ingrowth by connective tissue | Absent | 0 |
| Single strands of connective tissue penetrating the surface layer of the implant | 1 |
| Few strands of connective tissue penetrating 1/3 of the implant thickness | 2 |
| Numerous strands of connective tissue penetrating 1/2 of the implant thickness | 3 |
| Numerous strands of connective tissue penetrating the entire implant | 4 |
| Connective tissue capsule around the implant | Absent | 0 |
| Very thin (10-50 µm) with minimal inflammatory infiltration and vascularization | 1 |
| Thin (50-200 µm) with weak inflammatory infiltration and vascularization | 2 |
| Fairly thick (200-400 µm) with moderate inflammatory infiltration and vascularization | 3 |
| Significant thickness (more than 400 µm) with pronounced inflammatory infiltration and vascularization | 4 |
